# Supplementary material for: Neuron specific enolase promotes tumor metastasis by activating the Wnt/β-catenin pathway in small cell lung cancer
Source: PubMed Central journal article supplement — Transl Oncol. 2021 Feb 19;14(4):101039. doi: 10.1016/j.tranon.2021.101039 (PMC7905480; doi:10.1016/j.tranon.2021.101039), 2021-02-19
Supplement: mmc1.pdf [file mmc1.pdf]

Supplementary Table 1 shRNAs used in PLKO vector

| Gene name            | shRNA sequence                                                                                                                                     |
|----------------------|----------------------------------------------------------------------------------------------------------------------------------------------------|
| Sh1 NSE              | (Forward)CCGGCAAGGGAGTCATCAAGGACAACCTCGA<br>GTTGTCCTTGATGACTCCCTTGTTTTG<br>(Reverse)AATTCAAAAACAAGGGAGTCATCAAGGACA<br>ACTCGAGTTGTCCTTGATGACTCCCTTG |
| Sh2 NSE              | (Forward)CCGGGCGTACTTAGGCAAAGGTGTCTCGAG<br>ACACCTTTGCCTAAGTAACGCTTTTTG<br>(Reverse)AATTCAAAAAGCGTACTTAGGCAAAGGTGT<br>CTCGAGACACCTTTGCCTAAGTAACGC   |
| Sh1 $\beta$ -catenin | (Forward)CCGGTGTATCAGAGGACTAAATACTCGAG<br>TATTTAGTCCTCTGATAACAATTTTTG<br>(Reverse)AATTCAAAAATTGTTATCAGAGGACTAAATA<br>CTCGAGTATTTAGTCCTCTGATAACAA   |
| Sh2 $\beta$ -catenin | (Forward)CCGGTCTAACCTCACTTGCAATAATCTCGAG<br>ATTATTGCAAGTGAGGTTAGATTTTTG<br>(Reverse)AATTCAAAAATCTAACCTCACTTGCAATAAT<br>CTCGAGATTATTGCAAGTGAGGTTAGA |

Supplementary Table 2 Primers used in qRT-PCR

| Gene name        | Primer sequence                                                      |
|------------------|----------------------------------------------------------------------|
| E-cadherin       | (Forward) ATTTTCCCTCGACACCCGAT<br>(Reverse) TCCCAGGCGTAGACCAAGA      |
| N-cadherin       | (Forward) AGCCAACCTTAACTGAGGAGT<br>(Reverse) GGCAAGTTGATTGGAGGGATG   |
| $\beta$ -catenin | (Forward) CATCTACACAGTTTGATGCTGCT<br>(Reverse) GCAGTTTTGTCAGTTCAGGGA |
| c-myc            | (Forward) GTCAAGAGGCGAACACACAAC<br>(Reverse) TTGGACGGACAGGATGTATGC   |
| Snail            | (Forward) CGAGTGGTTCTTCTGCGCTA<br>(Reverse) CTGCTGGAAGGTAAACTCTGGA   |
| Slug             | (Forward) TAGAACTCACACGGGGGAGAAG<br>(Reverse) ATTGCGTCACTCAGTGTGCT   |
| NSE              | (Forward) AGCCTCTACGGGCATCTATGA<br>(Reverse) TTCTCAGTCCCATCCAATCC    |
| 18s              | (Forward) CGGCGACGACCCATTCGAAC<br>(Reverse) GAATCGAACCCCTGATCCCCGTC  |
