# Supplementary material for: Neuron specific enolase promotes tumor metastasis by activating the Wnt/β-catenin pathway in small cell lung cancer
Source: PubMed Central journal article supplement — Transl Oncol. 2021 Feb 19;14(4):101039. doi: 10.1016/j.tranon.2021.101039 (PMC7905480; doi:10.1016/j.tranon.2021.101039), 2021-02-19
Supplement: mmc2.pdf [file mmc2.pdf]

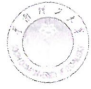

华南理工大学

实验动物伦理审查意见表

|                                                                                                                                                                                                                            |                |                                                                                                       |      |            |
|----------------------------------------------------------------------------------------------------------------------------------------------------------------------------------------------------------------------------|----------------|-------------------------------------------------------------------------------------------------------|------|------------|
| 申请人填写处                                                                                                                                                                                                                     | 项目名称           | NSE 增强小细胞肺癌干细胞“干性”促进脑转移的作用及分子机制研究                                                                     |      |            |
|                                                                                                                                                                                                                            | 申请人            | 刘国龙                                                                                                   |      |            |
| 实验动物伦理委员会填写处                                                                                                                                                                                                               | 受理编号           | 2018013                                                                                               |      |            |
|                                                                                                                                                                                                                            | 审查形式           | <input type="checkbox"/> 会议 <input checked="" type="checkbox"/> 通讯                                    | 审查时间 | 2018年4月12日 |
|                                                                                                                                                                                                                            | 审查内容           |                                                                                                       |      |            |
|                                                                                                                                                                                                                            | 审查项目           |                                                                                                       | 审查项目 |            |
|                                                                                                                                                                                                                            | 参与实验人员资质       | <input type="checkbox"/> 全部持证 <input checked="" type="checkbox"/> 部分持证 <input type="checkbox"/> 全部无证  |      |            |
|                                                                                                                                                                                                                            | 研究项目的重要性       | <input checked="" type="checkbox"/> 很重要 <input type="checkbox"/> 有价值 <input type="checkbox"/> 有限或无法评估 |      |            |
|                                                                                                                                                                                                                            | 达到研究目的可能性      | <input checked="" type="checkbox"/> 很可能 <input type="checkbox"/> 可能 <input type="checkbox"/> 有限或无法评估  |      |            |
|                                                                                                                                                                                                                            | 动物种类和数量选择的合理性  | <input checked="" type="checkbox"/> 理由充分 <input type="checkbox"/> 较合理 <input type="checkbox"/> 缺乏有效证据 |      |            |
|                                                                                                                                                                                                                            | 动物疼痛和痛苦控制措施    | <input checked="" type="checkbox"/> 措施得当 <input type="checkbox"/> 措施尚可 <input type="checkbox"/> 措施不足  |      |            |
|                                                                                                                                                                                                                            | 动物术后护理及安乐死处理措施 | <input checked="" type="checkbox"/> 措施得当 <input type="checkbox"/> 措施尚可 <input type="checkbox"/> 措施不足  |      |            |
| 审查意见                                                                                                                                                                                                                       |                |                                                                                                       |      |            |
| <p>综合评价：</p> <p>该项目研究注重动物福利，实验动物数量使用合理，实验过程注重动物福利保护，麻醉剂和消毒方式符合伦理要求。</p> <p style="text-align: center;"><input checked="" type="checkbox"/>建议批准实验； <input type="checkbox"/>调整方案后，可以进行实验； <input type="checkbox"/>建议不予批准</p> |                |                                                                                                       |      |            |
| 伦理委员会主任签名：                                                                                                                                                                                                                 |                |                                                                                                       |      |            |
| <br>华南理工大学实验动物伦理委员会（公章）                                                                                                                |                |                                                                                                       |      |            |
